# Supplementary figures and images for: Serum and mucosal antibody responses to inactivated polio vaccine after sublingual immunization using a thermoresponsive gel delivery system
Source: PubMed Central journal article supplement — Hum Vaccin Immunother. 2014 Nov 1;10(12):3611–21. doi: 10.4161/hv.32253 (PMC4514067; doi:10.4161/hv.32253), 2014-11-01

Supplementary Figure 1.

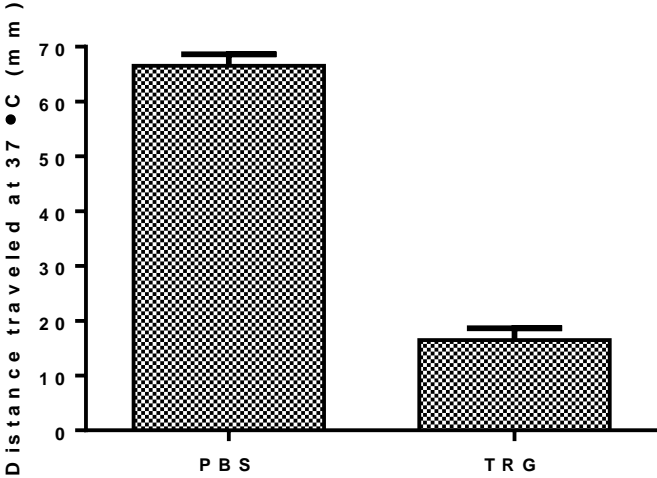

Supplementary Figure 2.

A.

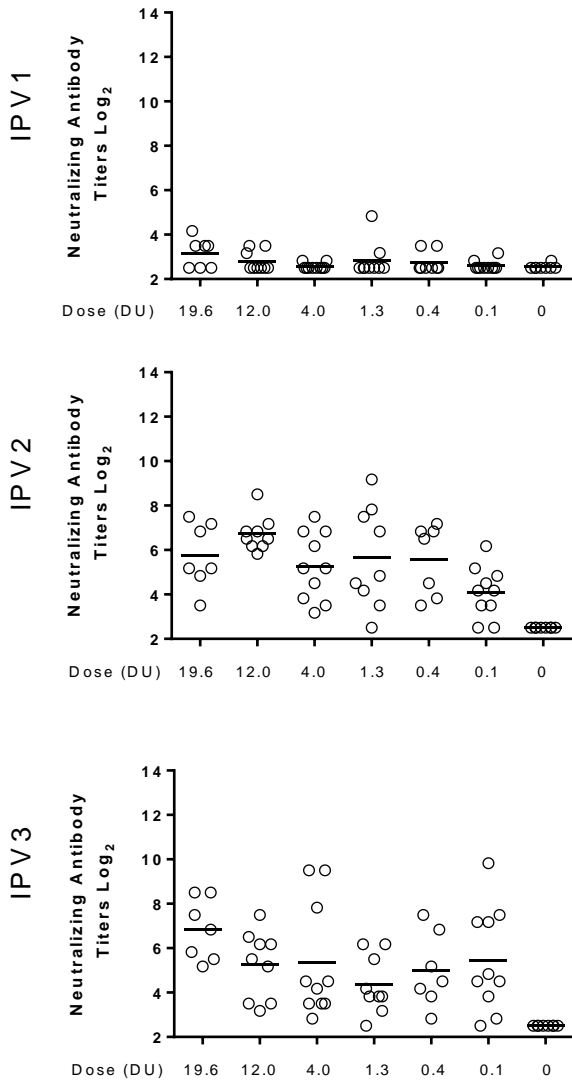

B.

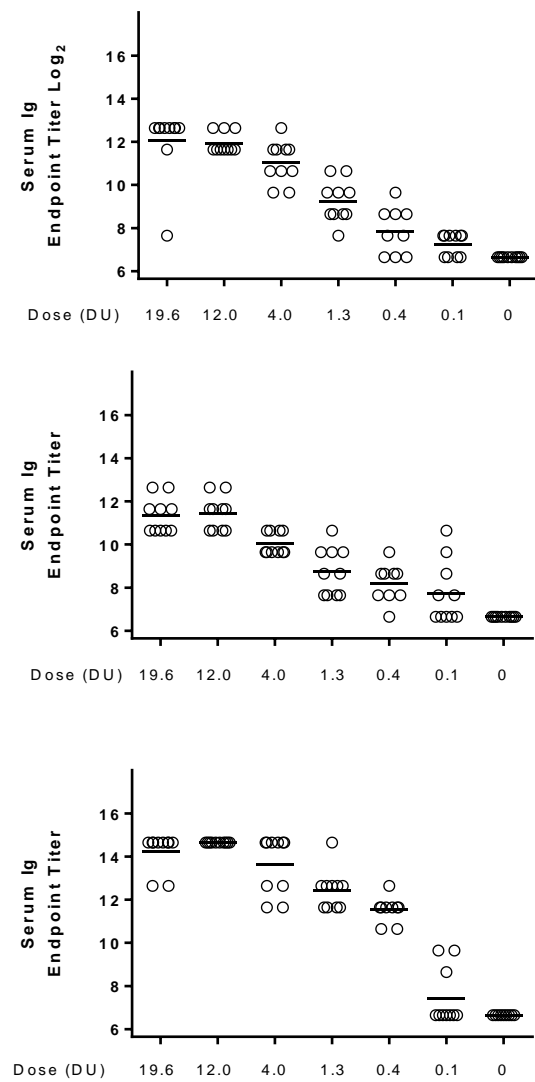

Supplementary Figure 3.

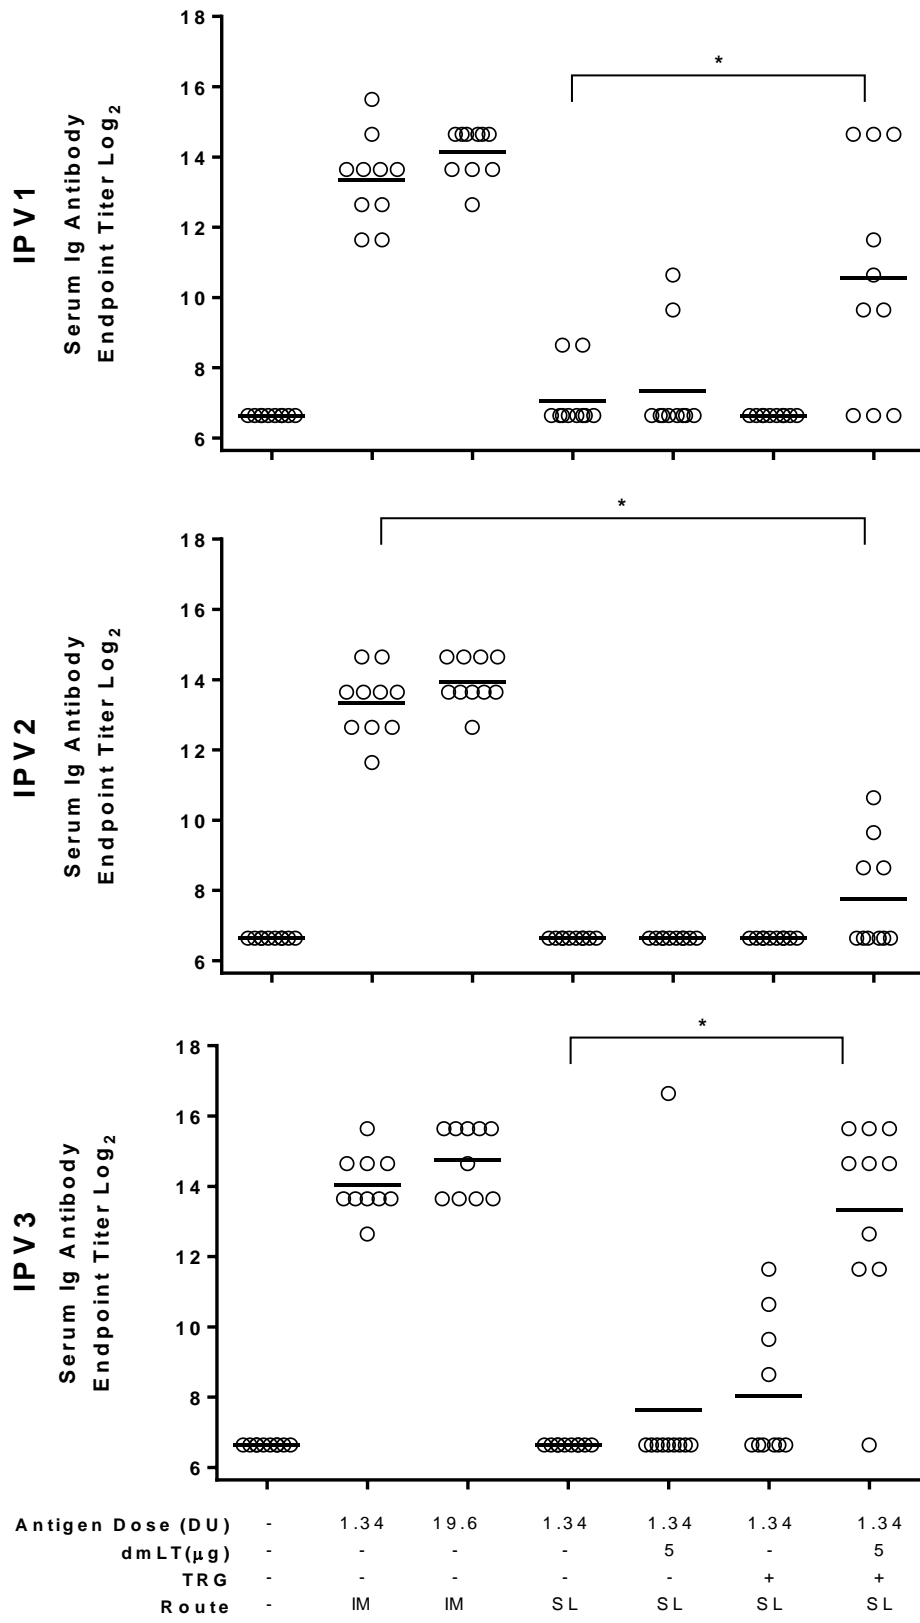

Supplementary Figure 4.

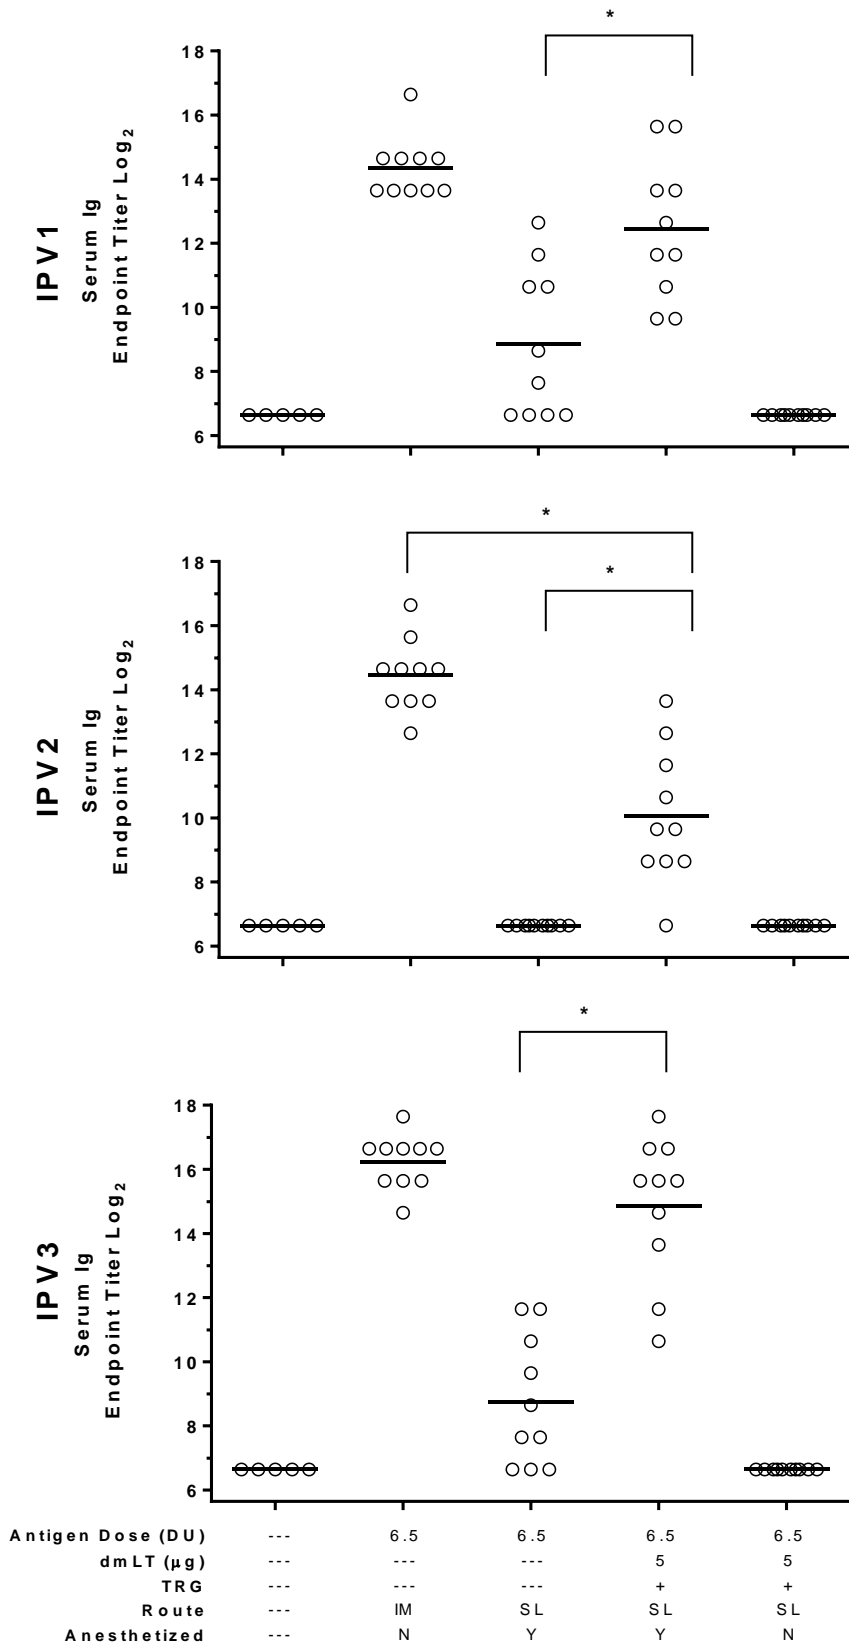

Supplement: khvi-10-12-977736-s001.pdf [file khvi-10-12-977736-s001.pdf]
